# Supplementary material for: Comparison of the effect of chemically and biologically induced inflammation on the volatile metabolite production of lung epithelial cells by GC×GC-TOFMS
Source: Royal Society of Chemistry journal article supplement (doi:10.1039/d0an00720j), 2020-01-01
Supplement: d0an00720j1.pdf [file d0an00720j1.pdf]

1  
2 **ONLINE REPOSITORY**

3 **Comparison of the effect of chemically and biologically induced inflammation on the**  
4 **volatile metabolite production of lung epithelial cells by GC×GC-TOFMS**

5 Delphine Zanella<sup>1\*</sup>, Monique Henket<sup>2</sup>, Florence Schleich<sup>2</sup>, Thibaut Dejong<sup>1</sup>, Renaud Louis<sup>2</sup>,  
6 Jean-François Focant<sup>1</sup> and Pierre-Hugues Stefanuto<sup>1</sup>

7 <sup>1</sup> University of Liège, Molecular System, Organic & Biological Analytical Chemistry Group, 11  
8 Allee du Six Aout, 4000 Liege, Belgium;

9 <sup>2</sup> Respiratory Medicine, GIGA I<sup>3</sup>, CHU Sart-Tilman, Liege, Belgium

10

11 **\*Corresponding author: Delphine Zanella.** University of Liege, Molecular System, Organic &  
12 Biological Analytical Chemistry Group, 11 Allee du Six Aout, 4000 Liege, Belgium. Phone  
13 number: +32 (0)4 366 37 09. Fax: +32 (0)4 366 43 87. E-mail address: [d.zanella@uliege.be](mailto:d.zanella@uliege.be).

14

15

16

## 16 MATERIALS AND METHODS

### 17 Quality control procedure

18 Prior to the analysis of volatile organic compounds (VOCs) released by the cells *in-vitro*, the  
19 repeatability and the stability of the analytical method were evaluated. This quality control  
20 procedure consisted in the injection of the Grob mixture every batch of 20 samples in order to  
21 monitor analytical variations and correct bias if required. The Grob mixture (containing 2,3-  
22 Butanediol (CAS#: 6982-25-8), Decane (CAS#: 124-18-5), 1-Octanol (CAS#: 111-87-5),  
23 Undecane (CAS#: 1120-21-4), Nonanal (CAS#: 124-19-6), 2,6-Dimethylphenol (CAS#: 576-26-  
24 1), 2,6-Dimethylaniline (CAS#: 87-62-7), Methyl decanoate (CAS#: 110-42-9), Methyl  
25 undecanoate (CAS#: 1731-86-8), Methyl dodecanoate (CAS#: 111-82-0), Dicyclohexylamine  
26 (CAS#: 103-83-7)) (Supelco, Bellefonte, PA, USA) injections covered the entire period of  
27 samples analysis. Raw peak areas were monitored and relative standard deviations (RSD) below  
28 10 % were obtained for all the standards in the Grob Mix, except for dicyclohexylamine  
29 (12 %RSD) and methyl laureate (11.1 %RSD) (Table E1).

30 This procedure reveals the high stability of the GC×GC system used. This latter insures that the  
31 observed *in-vitro* metabolic changes are not due to analytical variations, increasing the  
32 confidence in the obtained results. In addition, the stability of the instrumentation over the time  
33 of the experiments enables to perform minimal data pre-processing (*i.e.*, auto-scale) prior to  
34 further statistical analysis, preserving the integrity of the data.

35

36

37 **Table E1.** Grob mixture compounds used for the evaluation of the stability and repeatability of  
 38 the SPME-GC×GC-TOFMS system used in this study.

| ID# | Compounds           | Chemical                                       |           |                                   |                                 |     |         |
|-----|---------------------|------------------------------------------------|-----------|-----------------------------------|---------------------------------|-----|---------|
|     |                     | formula                                        | CAS#      | <sup>1</sup> t <sub>R</sub> [min] | <sup>2</sup> t <sub>R</sub> [s] | m/z | RSD [%] |
| 1   | 2,3-Butanediol      | C <sub>4</sub> H <sub>10</sub> O <sub>2</sub>  | 6982-25-8 | 4.83                              | 1.949                           | 45  | 5.6     |
| 2   | Decane              | C <sub>10</sub> H <sub>22</sub>                | 124-18-5  | 9.832                             | 1.289                           | 57  | 6.0     |
| 3   | 1-Octanol           | C <sub>8</sub> H <sub>18</sub> O               | 111-87-5  | 11.299                            | 1.671                           | 56  | 6.6     |
| 4   | Undecane            | C <sub>11</sub> H <sub>24</sub>                | 1120-21-4 | 11.899                            | 1.304                           | 57  | 6.4     |
| 5   | Nonanal             | C <sub>9</sub> H <sub>18</sub> O               | 124-19-6  | 11.999                            | 1.728                           | 41  | 6.1     |
| 6   | 2,6-Dimethylphenol  | C <sub>8</sub> H <sub>10</sub> O               | 576-26-1  | 12.099                            | 0.253                           | 107 | 6.6     |
| 7   | 2,6-Dimethylaniline | C <sub>8</sub> H <sub>11</sub> N               | 87-62-7   | 13.299                            | 0.52                            | 106 | 6.3     |
| 8   | Methyl caprate      | C <sub>11</sub> H <sub>22</sub> O <sub>2</sub> | 110-42-9  | 16.032                            | 1.663                           | 74  | 7.2     |
| 9   | Methyl undecanoate  | C <sub>12</sub> H <sub>24</sub> O <sub>2</sub> | 1731-86-8 | 17.698                            | 1.663                           | 74  | 9.6     |
| 10  | Dicyclohexylamine   | C <sub>12</sub> H <sub>23</sub> N              | 101-83-7  | 17.732                            | 1.863                           | 138 | 12.3    |
| 11  | Methyl laurate      | C <sub>13</sub> H <sub>26</sub> O <sub>2</sub> | 111-82-0  | 19.232                            | 1.677                           | 74  | 11.1    |

39

#### 40 **Sample analysis**

41 Volatile metabolites were extracted using a divinylbenzene/carboxen/polydimethylsiloxane  
 42 (DVB/CAR/PDMS) fiber from Supelco (Bellefonte, PA, USA). The samples were incubated 10  
 43 min at 40 °C prior to the fiber exposure and analytes extraction for 30 min at 40 °C. The fiber  
 44 was desorbed into the GC injector for 3 min at 250 °C in split mode (1:10). Regarding the  
 45 analysis, the column set used consisted in a non-polar Rxi-5SilMS (30 m × 0.25 mm id × 0.25  
 46 μm d<sub>i</sub>) connected to a mid-polar Rxi-17SilMS (2 m × 0.25 mm id × 0.25 μm d<sub>i</sub>) (Restek  
 47 Corporation, Bellefonte, PA, USA). Helium was used as carrier gas, at a flow rate of  
 48 1.4 mL/min. The primary oven temperature program was 40 °C (hold 1 min) ramped to 200 °C at  
 49 a rate of 5 °C/min. A fast temperature ramp of 15 °C /min to 270 °C assured the system cleaning  
 50 for the successive analysis. The secondary oven offset was +5 °C and the modulator offset was

51 +20 °C from the primary oven. A modulation period of 2.5 s was used. A mass range of 40 to  
52 500  $m/z$  was collected at a rate of 200 spectra/sec. The ion source was maintained at 250 °C.  
53 Data acquisition was performed using ChromaTOF software version 5.32 (LECO Corporation).

## 54 RESULTS

### 55 Volatile fingerprint of A549 cells

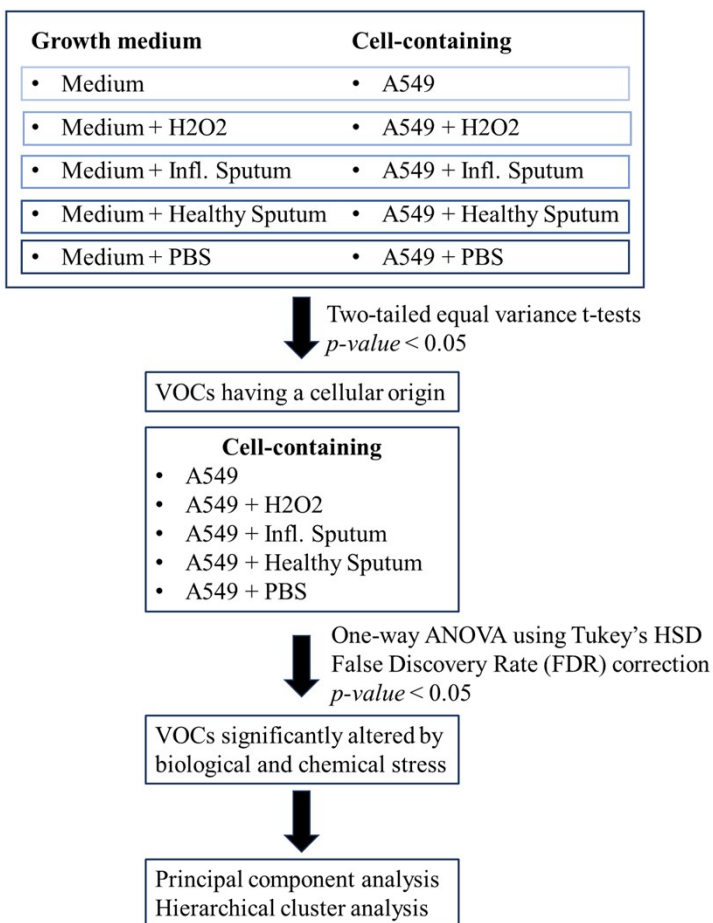

56

57 **Figure E1.** Statistical workflow followed to analyze and identify specific VOCs to the chemical  
58 and biological stress.

59

60

61

62

63 **Effect of H<sub>2</sub>O<sub>2</sub> on endogenous VOCs**

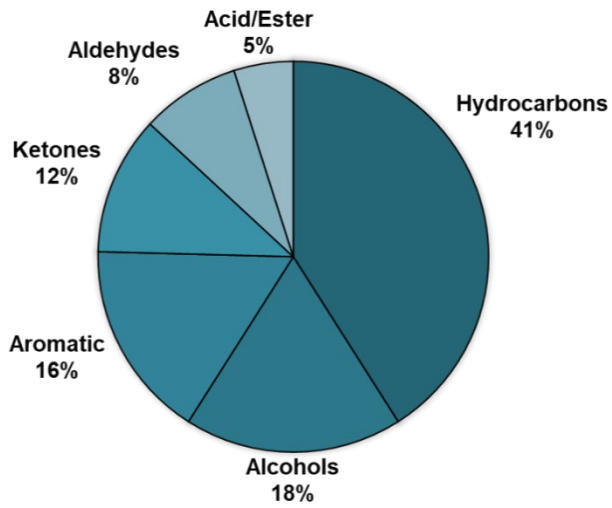

64

65 **Figure E2.** Affected chemical classes after the 0.1 mM H<sub>2</sub>O<sub>2</sub> challenge on A549 volatile  
66 emissions.

67

68 **Effect of inflammatory sputum supernatant on cell viability**

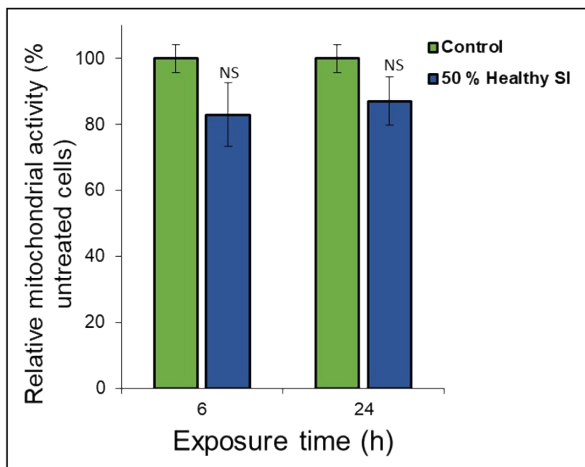

69

70 **Figure E3.** Mitochondrial activity of A549 cells treated with 50% (v/v) of healthy sputum  
71 supernatant; (NS) non-significant. (Control: mitochondrial activity of non-treated A549 cells).

72

73 **Exposure of A549 with sputum increased the volatile production**

74 **Table E2.** Tentative identification of the 97 altered VOCs following the chemical (H<sub>2</sub>O<sub>2</sub>) and the  
 75 biological (inflammatory sputum, SI) challenge.

| VOC# | Putative Name                           | Formula                                        | Exp. LRI | Lib. LRI | Match Factor | MSI level | VOC alteration                      |
|------|-----------------------------------------|------------------------------------------------|----------|----------|--------------|-----------|-------------------------------------|
| 1    | Alkene                                  | /                                              | 996      | /        | /            | 3         | ↓SI                                 |
| 2    | 2,4-Dimethyl-1-heptene                  | C <sub>9</sub> H <sub>18</sub>                 | 840      | 842      | 873          | 2         | ↓SI                                 |
| 3    | 1-Nonene                                | C <sub>9</sub> H <sub>18</sub>                 | 853      | 880      | 789          | 2         | ↓SI                                 |
| 4    | 1-Heptene, 4-methyl-                    | C <sub>8</sub> H <sub>16</sub>                 | 761      | 755      | 880          | 2         | ↑H <sub>2</sub> O <sub>2</sub>      |
| 5    | Octanal                                 | C <sub>8</sub> H <sub>16</sub> O               | 1024     | 1004     | 801          | 2         | ↑SI, ↑H <sub>2</sub> O <sub>2</sub> |
| 6    | Cyclohexanol                            | C <sub>6</sub> H <sub>12</sub> O               | 890      | 869      | 800          | 2         | ↑H <sub>2</sub> O <sub>2</sub>      |
| 7    | Diisopentyl oxalate                     | /                                              | 972      | NR*      | 751          | 3         | ↑SI, ↑H <sub>2</sub> O <sub>2</sub> |
| 8    | Glutaric acid, butyl isobutyl ester     | C <sub>13</sub> H <sub>24</sub> O <sub>4</sub> | 1657     | 1647     | 871          | 2         | ↑SI, ↑H <sub>2</sub> O <sub>2</sub> |
| 9    | Trimethyl-1,3-pentanediol diisobutyrate | C <sub>16</sub> H <sub>30</sub> O <sub>4</sub> | 1554     | 1587     | 751          | 3         | ↑SI, ↑H <sub>2</sub> O <sub>2</sub> |
| 10   | Decanal                                 | C <sub>10</sub> H <sub>20</sub> O              | 1206     | 1200     | 806          | 2         | ↑SI, ↑H <sub>2</sub> O <sub>2</sub> |
| 11   | 1-Hexanol, 2-ethyl                      | C <sub>8</sub> H <sub>18</sub> O               | 1029     | 1029     | 894          | 2         | ↑H <sub>2</sub> O <sub>2</sub>      |
| 12   | 8-Hydroxy-2-octanone                    | C <sub>8</sub> H <sub>16</sub> O <sub>2</sub>  | 930      | NR*      | 793          | 3         | ↑SI, ↑H <sub>2</sub> O <sub>2</sub> |
| 13   | 2-Butoxyethanol                         | C <sub>6</sub> H <sub>14</sub> O <sub>2</sub>  | 910      | 893      | 764          | 2         | ↑SI, ↑H <sub>2</sub> O <sub>2</sub> |
| 14   | 1,7-Octanediol, 3,7-dimethyl-           | C <sub>10</sub> H <sub>22</sub> O <sub>2</sub> | 983      | NR*      | 750          | 3         | ↑H <sub>2</sub> O <sub>2</sub>      |
| 15   | 2-Heptanone, 4-methyl-                  | C <sub>8</sub> H <sub>16</sub> O               | 939      | 936      | 758          | 2         | ↑H <sub>2</sub> O <sub>2</sub>      |
| 16   | Hexene, 4-ethyl                         | C <sub>8</sub> H <sub>16</sub>                 | 751      | NR*      | 751          | 3         | ↑H <sub>2</sub> O <sub>2</sub>      |
| 17   | Alkane                                  | /                                              | 902      | /        | /            | 2         | ↑H <sub>2</sub> O <sub>2</sub>      |
| 18   | Decane                                  | C <sub>10</sub> H <sub>22</sub>                | 991      | 1000     | 853          | 2         | ↑SI, ↑H <sub>2</sub> O <sub>2</sub> |
| 19   | Terpene                                 | C <sub>10</sub> H <sub>16</sub>                | 935      | /        | /            | 3         | ↑H <sub>2</sub> O <sub>2</sub>      |
| 20   | Benzaldehyde, 2,4-dimethyl-             | C <sub>9</sub> H <sub>10</sub> O               | 1208     | 1181     | 859          | 2         | ↑H <sub>2</sub> O <sub>2</sub>      |
| 21   | Hexanal                                 | C <sub>6</sub> H <sub>12</sub> O               | 800      | 801      | 858          | 2         | ↑SI, ↑H <sub>2</sub> O <sub>2</sub> |
| 22   | Ester                                   | /                                              | 957      | /        | /            | 3         | ↑SI, ↑H <sub>2</sub> O <sub>2</sub> |
| 23   | Hexane, 3-ethyl-                        | C <sub>8</sub> H <sub>18</sub>                 | 804      | 775      | 767          | 2         | ↑SI, ↓H <sub>2</sub> O <sub>2</sub> |
| 24   | 5-Hepten-2-one, 6-methyl                | C <sub>8</sub> H <sub>14</sub> O               | 980      | 988      | 700          | 3         | ↑SI, ↓H <sub>2</sub> O <sub>2</sub> |
| 25   | Tetradecane                             | C <sub>14</sub> H <sub>30</sub>                | 1400     | 1400     | 824          | 2         | ↑SI, ↓H <sub>2</sub> O <sub>2</sub> |
| 26   | Alkane                                  | /                                              | 970      | /        | /            | 3         | ↑H <sub>2</sub> O <sub>2</sub>      |
| 27   | 1-Hexanol                               | C <sub>6</sub> H <sub>14</sub> O               | 868      | 872      | 876          | 2         | ↑SI                                 |
| 28   | 2-Hexanone                              | C <sub>6</sub> H <sub>12</sub> O               | 796      | 790      | 823          | 2         | ↑SI                                 |
| 29   | Benzaldehyde, 4-ethyl-                  | C <sub>9</sub> H <sub>10</sub> O               | 1164     | 1180     | 859          | 2         | ↑SI                                 |
| 30   | Hydrazide derivatives                   | /                                              | 957      | /        | /            | 3         | ↑SI                                 |
| 31   | Alkane                                  | /                                              | 1481     | /        | /            | 3         | ↑SI                                 |

|    |                                      |                                                |      |      |     |   |                                     |
|----|--------------------------------------|------------------------------------------------|------|------|-----|---|-------------------------------------|
| 32 | Decane, 2,3,7-trimethyl              | C <sub>13</sub> H <sub>28</sub>                | 1463 | 1466 | 801 | 2 | ↑SI, ↑H <sub>2</sub> O <sub>2</sub> |
| 33 | 2(5H)-Furanone                       | C <sub>4</sub> H <sub>4</sub> O <sub>2</sub>   | 914  | 916  | 739 | 3 | ↑SI                                 |
| 34 | 2-Hexyl-1-octanol                    | C <sub>14</sub> H <sub>30</sub> O              | 1554 | NR*  | 844 | 3 | ↑SI                                 |
| 35 | Alcohol                              | /                                              | 1525 | /    | /   | 3 | ↑SI                                 |
| 36 | 1-Decanol                            | C <sub>10</sub> H <sub>22</sub> O              | 1258 | 1259 | 762 | 2 | ↑SI                                 |
| 37 | Alkane                               | /                                              | 1264 | /    | /   | 3 | ↑SI                                 |
| 38 | Alkane                               | /                                              | 1354 | /    | /   | 3 | ↑SI                                 |
| 39 | Alkane                               | /                                              | 1252 | /    | /   | 3 | ↑SI                                 |
| 40 | Ethanol, 2-(2-ethoxyethoxy)-         | C <sub>6</sub> H <sub>14</sub> O <sub>3</sub>  | 1007 | 1019 | 984 | 2 | ↑SI                                 |
| 41 | Alkane                               | C <sub>14</sub> H <sub>30</sub>                | 1275 | /    | /   | 3 | ↑SI                                 |
| 42 | 1-Nonanol                            | C <sub>9</sub> H <sub>20</sub> O               | 1133 | 1151 | 773 | 2 | ↑SI, ↓H <sub>2</sub> O <sub>2</sub> |
| 43 | Nonanal                              | C <sub>9</sub> H <sub>18</sub> O               | 1120 | 1002 | 854 | 2 | ↑SI, ↓H <sub>2</sub> O <sub>2</sub> |
| 44 | Alkane                               | /                                              | 1058 | /    | /   | 3 | ↑SI                                 |
| 45 | Alkane                               | /                                              | 1064 | /    | /   | 3 | ↑SI                                 |
| 46 | Tridecene                            | C <sub>13</sub> H <sub>26</sub>                | 1307 | 1295 | 818 | 2 | ↑SI                                 |
| 47 | Alcohol                              | /                                              | 1324 | /    | /   | 3 | ↑SI                                 |
| 48 | Alcohol                              | /                                              | 1314 | /    | /   | 3 | ↑SI                                 |
| 49 | Alkane                               | /                                              | 1337 | /    | /   | 3 | ↑SI                                 |
| 50 | Alkane                               | /                                              | 1246 | /    | /   | 3 | ↑SI                                 |
| 51 | Alkane                               | /                                              | 1281 | /    | /   | 3 | ↑SI                                 |
| 52 | Ester                                | /                                              | 1381 | /    | /   | 3 | ↑SI                                 |
| 53 | 2,3-dimethyldecane                   | C <sub>12</sub> H <sub>26</sub>                | 1103 | 1122 | 827 | 2 | ↑SI, ↑H <sub>2</sub> O <sub>2</sub> |
| 54 | Alkane                               | /                                              | 1346 | /    | /   | 3 | ↑SI                                 |
| 55 | Sulfur containing                    | /                                              | 1089 | /    | /   | 3 | ↑SI                                 |
| 56 | Alkane                               | /                                              | 1237 | /    | /   | 3 | ↑SI                                 |
| 57 | Undecane                             | C <sub>11</sub> H <sub>24</sub>                | 1096 | 1100 | 750 | 2 | ↑SI                                 |
| 58 | 5,9-Undecadien-2-one, 6,10-dimethyl- | C <sub>13</sub> H <sub>22</sub> O              | 1453 | 1435 | 882 | 2 | ↑SI                                 |
| 59 | Aldehyde                             | /                                              | 1116 | /    | /   | 3 | ↑SI                                 |
| 60 | Ketone                               | /                                              | 1469 | /    | /   | 3 | ↑SI                                 |
| 61 | Alcohol                              | /                                              | 1665 | /    | /   | 3 | ↑SI, ↑H <sub>2</sub> O <sub>2</sub> |
| 62 | Ester                                | /                                              | 1258 | /    | /   | 3 | ↑SI, ↑H <sub>2</sub> O <sub>2</sub> |
| 63 | 1-(2,3-Dimethylphenyl)ethanone       | C <sub>10</sub> H <sub>12</sub> O <sub>2</sub> | 1265 | NR*  | 822 | 3 | ↑SI                                 |
| 64 | 2-Heptanone                          | C <sub>7</sub> H <sub>14</sub> O               | 880  | 891  | 827 | 2 | ↑SI, ↑H <sub>2</sub> O <sub>2</sub> |
| 65 | Ethanone, 1,1'-(1,3-phenylene)bis-   | C <sub>10</sub> H <sub>10</sub> O <sub>2</sub> | 1441 | NR*  | 882 | 3 | ↑SI                                 |
| 66 | Alkane                               | /                                              | 1215 | /    | /   | 3 | ↑SI                                 |
| 67 | Furan Derivatives                    | /                                              | 1214 | /    | /   | 3 | ↑SI, ↑H <sub>2</sub> O <sub>2</sub> |
| 68 | Hexadecane                           | C <sub>16</sub> H <sub>34</sub>                | 1600 | 1600 | 744 | 3 | ↑H <sub>2</sub> O <sub>2</sub>      |
| 69 | Aromatic                             | /                                              | 1643 | /    | /   | 3 | ↑SI                                 |
| 70 | Cyclohexanone                        | C <sub>6</sub> H <sub>10</sub> O               | 895  | 896  | 820 | 2 | ↑SI, ↑H <sub>2</sub> O <sub>2</sub> |

|    |                                    |                                                |      |      |     |   |                                     |
|----|------------------------------------|------------------------------------------------|------|------|-----|---|-------------------------------------|
| 71 | Ethanone, 1-(4-ethylphenyl)-       | C <sub>10</sub> H <sub>12</sub> O              | 1290 | 1277 | 854 | 2 | ↑SI                                 |
| 72 | Ester                              | /                                              | 1307 | /    | /   | 3 | ↑SI, ↑H <sub>2</sub> O <sub>2</sub> |
| 73 | Ethanone, 1,1'-(1,4-phenylene)bis- | C <sub>10</sub> H <sub>10</sub> O <sub>2</sub> | 1452 | 1461 | 910 | 2 | ↑SI                                 |
| 74 | Aldehyde                           | /                                              | 957  | /    | /   | 3 | ↑SI                                 |
| 75 | Dodecane                           | C <sub>12</sub> H <sub>26</sub>                | 1200 | 1200 | 806 | 2 | ↑SI, ↓H <sub>2</sub> O <sub>2</sub> |
| 76 | Tridecane                          | C <sub>13</sub> H <sub>28</sub>                | 1300 | 1300 | 727 | 3 | ↑SI                                 |
| 77 | Alkene                             | /                                              | 1324 | /    | /   | 3 | ↑SI                                 |
| 78 | Alcohol                            | /                                              | 1174 | /    | /   | 3 | ↑SI                                 |
| 79 | Alkane                             | /                                              | 1171 | /    | /   | 3 | ↑SI                                 |
| 80 | 1-Dodecene                         | C <sub>12</sub> H <sub>24</sub>                | 1173 | 1189 | 750 | 2 | ↑SI, ↑H <sub>2</sub> O <sub>2</sub> |
| 81 | Ketone                             | /                                              | 1511 | /    | /   | 3 | ↑SI                                 |
| 82 | Acetophenone                       | C <sub>8</sub> H <sub>8</sub> O                | 1066 | 1070 | 873 | 2 | ↑SI                                 |
| 83 | Aromatic                           | /                                              | 1086 | /    | /   | 3 | ↑SI                                 |
| 84 | Acetophenone, 2'-hydroxy-          | C <sub>8</sub> H <sub>8</sub> O <sub>2</sub>   | 1165 | 1163 | 863 | 2 | ↑SI                                 |
| 85 | 2,5-Hexanediol, 2,5-dimethyl       | C <sub>8</sub> H <sub>18</sub> O <sub>2</sub>  | 940  | 916  | 766 | 2 | ↑SI, ↑H <sub>2</sub> O <sub>2</sub> |
| 86 | Ketone                             | /                                              | 1480 | /    | /   | 3 | ↑SI                                 |
| 87 | Alkane                             | /                                              | 1571 | /    | /   | 3 | ↑SI                                 |
| 88 | Aromatic                           | /                                              | 1504 | /    | /   | 3 | ↑SI                                 |
| 89 | Alkane                             | /                                              | 1454 | /    | /   | 3 | ↑SI                                 |
| 90 | Ester                              | /                                              | 891  | /    | /   | 3 | ↑SI, ↑H <sub>2</sub> O <sub>2</sub> |
| 91 | Aldehyde                           | /                                              | 1273 | /    | /   | 3 | ↑SI                                 |
| 92 | 1-Octanol, 6-methyl-               | C <sub>9</sub> H <sub>20</sub> O               | 1143 | 1154 | 778 | 2 | ↑SI                                 |
| 93 | Alcohol                            | /                                              | 1039 | /    | /   | 3 | ↑SI                                 |
| 94 | Alkane                             | /                                              | 1165 | /    | /   | 3 | ↑SI                                 |
| 95 | Alcohol                            | /                                              | 1168 | /    | /   | 3 | ↑SI                                 |
| 96 | Alkene                             | /                                              | 1100 | /    | /   | 3 | ↑SI, ↑H <sub>2</sub> O <sub>2</sub> |
| 97 | Butanoic acid, 4-hydroxy-          | C <sub>4</sub> H <sub>8</sub> O <sub>3</sub>   | 903  | 933  | 793 | 2 | ↑SI                                 |

76 \*NR: Not reported in the library
